# Supplementary material for: Well-faceted noble-metal nanocrystals with nonconvex polyhedral shapes
Source: Royal Society of Chemistry journal article supplement (doi:10.1039/c6cs00039h), 2016-01-01
Supplement: c6cs00039h1.pdf [file c6cs00039h1.pdf]

## Electronic Supplementary Information

### Well-faceted noble-metal nanocrystals with nonconvex polyhedral shapes

Qiaoli Chen,<sup>a</sup> Yanyan Jia,<sup>a</sup> Shuifen Xie,<sup>b</sup> Zhaoxiong Xie<sup>\*a</sup>

<sup>a</sup> State Key Laboratory of Physical Chemistry of Solid Surfaces, Collaborative Innovation Center of Chemistry for Energy Materials, and Department of Chemistry, College of Chemistry and Chemical Engineering, Xiamen University, Xiamen 361005, China.

<sup>b</sup> College of Materials Science and Engineering, Huaqiao University, Xiamen 361021, China.

E-mail: [zxxie@xmu.edu.cn](mailto:zxxie@xmu.edu.cn)

**Table 1** Summary of typical cases of NCs with nonconvex polyhedral structures synthesized using capping agents.

| Morphologies                                                                        | Ideal Exposed Facets | Metals            | Capping agents                                  | Metal Precursors                               | Other reactants and/or solvent | Methods, temperature and reaction time     | Reference |
|-------------------------------------------------------------------------------------|----------------------|-------------------|-------------------------------------------------|------------------------------------------------|--------------------------------|--------------------------------------------|-----------|
|    | {110}                | PtCu <sub>3</sub> | <i>N</i> -butylamine<br>CTAC                    | Pt(acac) <sub>2</sub><br>Cu(acac) <sub>2</sub> | DMF                            | Solvothermal synthesis,<br>150 °C for 10 h | 26        |
|    | {411}                | Pt                | Methylamine<br>PVP                              | H <sub>2</sub> PtCl <sub>6</sub>               | DMF                            | Solvothermal synthesis,<br>160 °C for 11 h | 35        |
|    | {211}                | Pt                | 1-octylamine                                    | Pt(acac) <sub>2</sub>                          | 1-octylamine                   | Solvothermal synthesis,<br>200 °C for 3 h  | 36        |
|   | {720}                | Au                | CTAC in<br>presence of Ag <sup>+</sup><br>ions  | Au seeds<br>HAuCl <sub>4</sub>                 | AA<br>HCl<br>H <sub>2</sub> O  | Seeded growth,<br>ambient temperature      | 40        |
|  | {110}+{100}          | Pd                | CTAB in<br>presence of Cu <sup>2+</sup><br>ions | Pd seeds<br>H <sub>2</sub> PdCl <sub>4</sub>   | AA<br>H <sub>2</sub> O         | Seeded growth,<br>40 °C for 12 h           | 70        |

|                                                                                     |       |       |          |                                                        |                        |                                                                                       |    |
|-------------------------------------------------------------------------------------|-------|-------|----------|--------------------------------------------------------|------------------------|---------------------------------------------------------------------------------------|----|
|    | {hhl} | Au    | CTAC     | Au seeds<br>HAuCl <sub>4</sub>                         | AA<br>H <sub>2</sub> O | Seeded growth,<br>25 °C for 1 h                                                       | 69 |
|    | {110} | Au    | CTAC     | HAuCl <sub>4</sub>                                     | AA<br>H <sub>2</sub> O | One-step synthesis,<br>4–6 °C , 8 h                                                   | 68 |
|    | {110} | Au-Pd | CTAC     | HAuCl <sub>4</sub><br>H <sub>2</sub> PdCl <sub>4</sub> | AA<br>H <sub>2</sub> O | One-step synthesis,<br>20 °C for 2 min and then<br>cooled down to 6 °C, 8 h           | 68 |
|   | /     | Pd    | KBr, PVP | Pd seeds<br>Na <sub>2</sub> PdCl <sub>4</sub>          | H <sub>2</sub> O       | Seeded growth,<br>low temperature or low<br>injection rate                            | 89 |
|  | {110} | Rh    | PVP      | Na <sub>3</sub> RhCl <sub>6</sub>                      | AA<br>CA<br>TriEG      | Injecting precursors to the<br>preheated reactants and<br>then keep at 145 °C for 3 h | 67 |

|                                                                                   |   |       |          |                                        |    |                                                                                                                  |    |
|-----------------------------------------------------------------------------------|---|-------|----------|----------------------------------------|----|------------------------------------------------------------------------------------------------------------------|----|
| 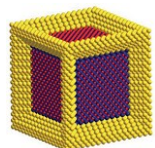 | / | Rh-Pd | PVP, KBr | Pd seeds<br>$\text{Na}_3\text{RhCl}_6$ | EG | Seeded growth,<br>injecting Rh precursors to<br>the preheated reactants<br>and then stay at 140 °C for<br>10 min | 90 |
|-----------------------------------------------------------------------------------|---|-------|----------|----------------------------------------|----|------------------------------------------------------------------------------------------------------------------|----|

Notes: DMF = *N, N*- dimethyl formamide; PVP = poly(vinyl pyrrolidone); AA = *L*-ascorbic acid; CTAC = cetyltrimethylammonium chloride; CTAB = cetyltrimethylammonium bromide; TriEG = triethylene glycol; CA = citric acid; EG = ethylene glycol.

**Table 2** Summary of typical cases of NCs with nonconvex polyhedral structures from etchants mediated synthesis.

| Initial shapes                                                                      | Final shapes                                                                        | Metals      | Etchants and etching mechanism                                               | Solvent                                 | Temperature      | Reference |
|-------------------------------------------------------------------------------------|-------------------------------------------------------------------------------------|-------------|------------------------------------------------------------------------------|-----------------------------------------|------------------|-----------|
|    |    | Ag          | Using $\text{NH}_4\text{OH}/\text{H}_2\text{O}_2$ to etch away Ag atoms      | A solution of PVP and water             | 4 °C             | 91        |
|   |   | Pt-Ni alloy | Using the coordination of Ni with dimethylglyoxime to etch away Ni atoms     | Water and ethanol                       | Room temperature | 92        |
|  |  | Pd          | Galvanic replacement Pd with $\text{H}_2\text{PtCl}_6$ to etch away Pd atoms | Aqueous solution containing PVP and KBr | 90 °C            | 93        |

|                                                                                   |                                                                                   |    |                                                                                                           |                                                       |        |    |
|-----------------------------------------------------------------------------------|-----------------------------------------------------------------------------------|----|-----------------------------------------------------------------------------------------------------------|-------------------------------------------------------|--------|----|
|  |  | Pd | Making use of the gradients of surface energy caused by heating the reverse micelle to etch away Pd atoms | Reverse micelle made of CTAB/octanol/H <sub>2</sub> O | 105 °C | 94 |
|-----------------------------------------------------------------------------------|-----------------------------------------------------------------------------------|----|-----------------------------------------------------------------------------------------------------------|-------------------------------------------------------|--------|----|

**Table 3** Summary of typical cases of NCs with nonconvex polyhedral structures from templates directed overgrowth and etching synthesis.

| Nanocages                                                                           | Metals | Facets | Templates     | Overgrowth condition, temperature and time                                                                                                                                                | Etching condition, temperature and time                                                                   | Reference |
|-------------------------------------------------------------------------------------|--------|--------|---------------|-------------------------------------------------------------------------------------------------------------------------------------------------------------------------------------------|-----------------------------------------------------------------------------------------------------------|-----------|
|   | Pt     | {100}  | Cubic Pd      | Na <sub>2</sub> PtCl <sub>6</sub> solution in EG were injected into the preheated EG solvent containing Pd seeds, AA, KBr, and PVP with 4.0 mL/h, and then stay at 200 °C for another 1 h | Etching in an aqueous solution containing FeCl <sub>3</sub> , KBr, PVP and HCl and stay at 100 °C for 3 h | 28        |
|  | Pt     | {111}  | Octahedral Pd |                                                                                                                                                                                           | Etching in an aqueous solution containing FeCl <sub>3</sub> , KBr, PVP and HCl and stay at 100 °C for 4 h |           |
